# Supplementary material
Source: Copernicus journal article supplement (doi:10.5194/tc-20-2629-2026)
Supplement: Supplementary file 1 [file tc-20-2629-2026-supplement.pdf]

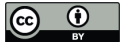

*Supplement of*

## **The PolarRES dataset: a state-of-the-art regional climate model ensemble for understanding Antarctic climate**

**Ella Gilbert et al.**

*Correspondence to:* Ella Gilbert ([ellagilbert.eg@gmail.com](mailto:ellagilbert.eg@gmail.com)) and Marte G. Hofsteenge ([m.g.hofsteenge@uu.nl](mailto:m.g.hofsteenge@uu.nl))

The copyright of individual parts of the supplement might differ from the article licence.

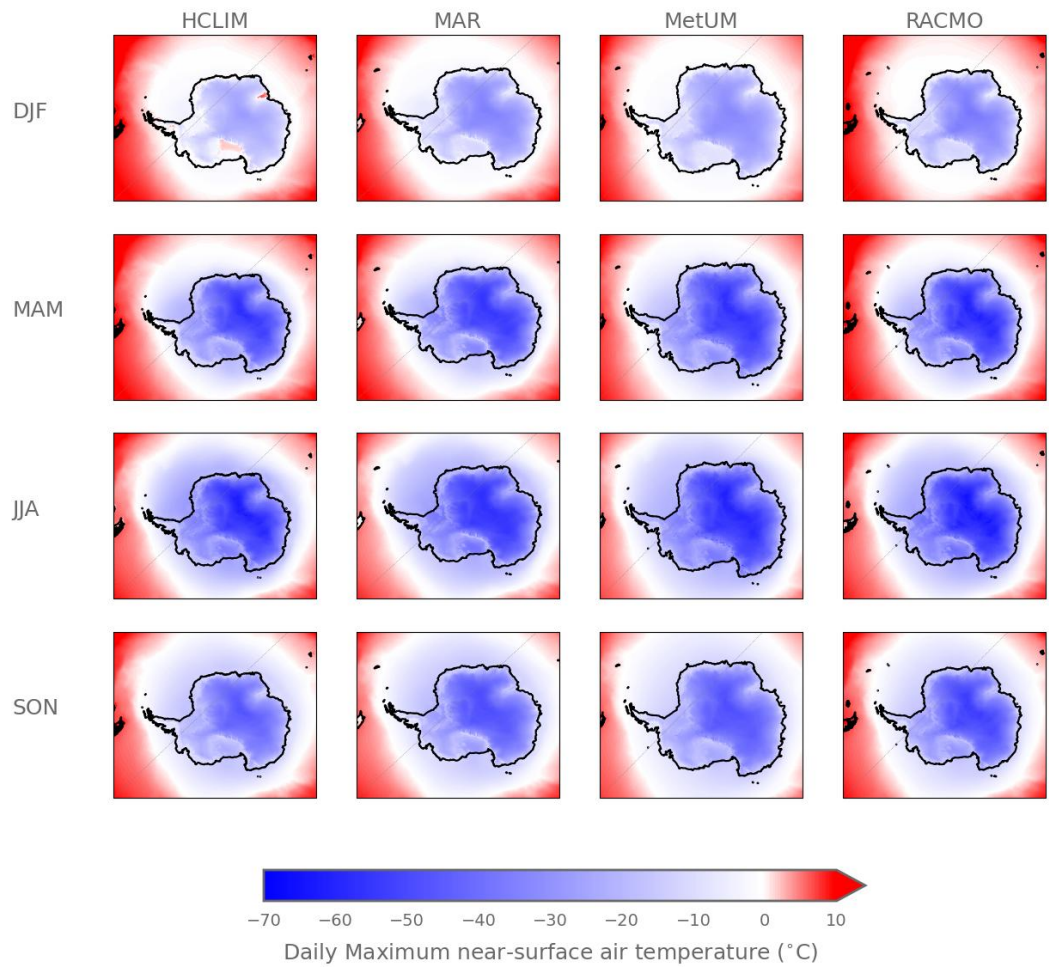

**Figure S1: Seasonal mean daily maximum near-surface air temperature, in °C, during the period 2000-2019 for each of the four RCMs: HCLIM, MAR, MetUM and RACMO.**
